# Supplementary material for: Bisthienylethenes containing an imidazole bridge unit and their Ir(iii) complexes: influence of substituent groups on photochromism and luminescence
Source: Royal Society of Chemistry journal article supplement (doi:10.1039/c6ra14555h), 2016-01-01
Supplement: c6ra14555h1.pdf [file c6ra14555h1.pdf]

## Electronic Supporting Information

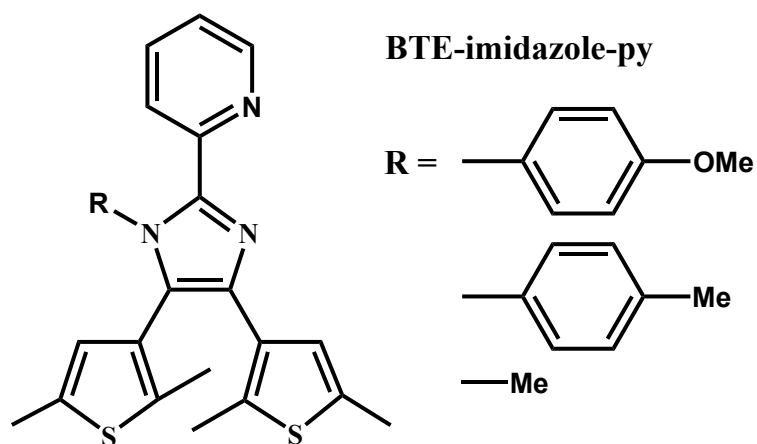

Scheme S1

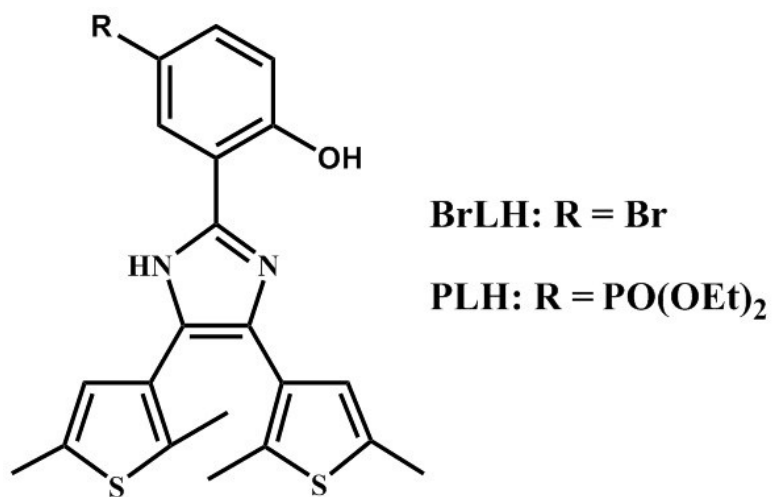

Scheme S2

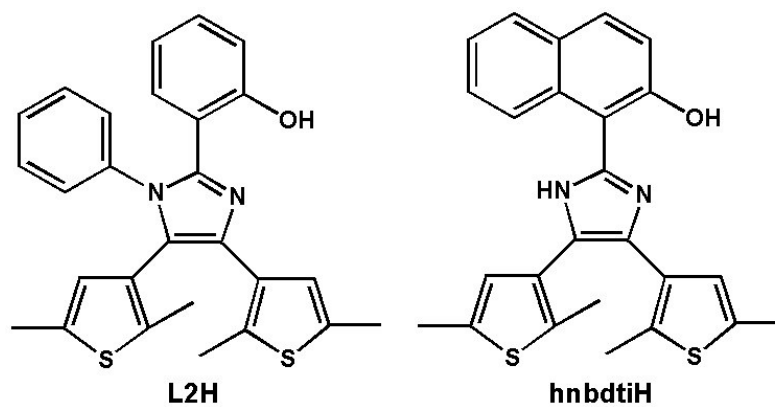

Scheme S3

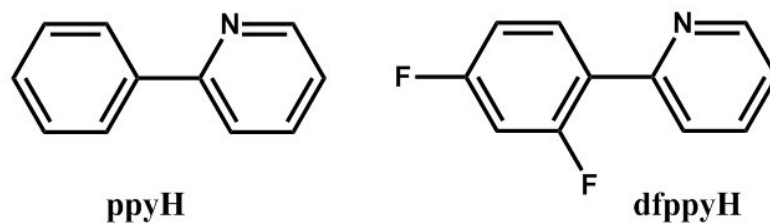

**Scheme S4**

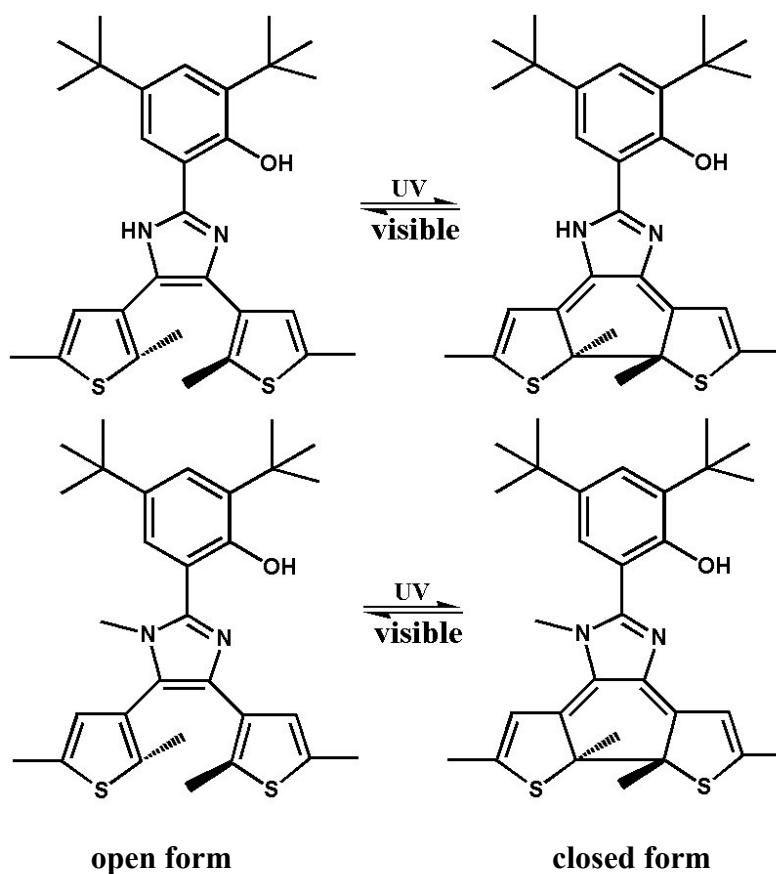

**Scheme S5 Structure transition of tBuLH (top) and tBuLMeH (bottom) between the open form and the closed form**

**Table S1** UV-vis absorption bands of tBuLH, tBuLMeH **1** and **2** in CH<sub>2</sub>Cl<sub>2</sub> at room temperature.

| Compound | $\lambda_{\max}$ (nm) |
|----------|-----------------------|
| tBuLH    | 228, 291, 326         |
| tBuLMeH  | 230, 291, 326         |
| <b>1</b> | 248, 379, 450         |
| <b>2</b> | 245, 346, 450         |

**Table S2** Emission data of tBuLH, tBuLMeH, **1**, **2** and [Ir(dfppy)<sub>2</sub>(L1)]·2CH<sub>3</sub>OH in CH<sub>2</sub>Cl<sub>2</sub> at room temperature and emission data of **1**, **2** and [Ir(dfppy)<sub>2</sub>(L1)]·2CH<sub>3</sub>OH in C<sub>2</sub>H<sub>5</sub>OH-CH<sub>3</sub>OH (v/v = 3/1) at 77 K.

| Compound                                          | emission wavelength (nm) at room temperature | emission wavelength (nm) at 77 K |
|---------------------------------------------------|----------------------------------------------|----------------------------------|
| L1H                                               | 442 nm <sup>a</sup>                          | -                                |
| tBuLH                                             | 464 nm                                       | -                                |
| tBuLMeH                                           | 479 nm                                       | -                                |
| [Ir(dfppy) <sub>2</sub> (L1)]·2CH <sub>3</sub> OH | 508 nm <sup>a</sup>                          | 471, 506 nm <sup>a,b</sup>       |
| <b>1</b>                                          | 514 nm                                       | 498 nm                           |
| <b>2</b>                                          | 507 nm                                       | 492 nm                           |

*a*: the data from *Dalton Trans.*, 2015, **44**, 4289; *b*: seeing Fig. S19.

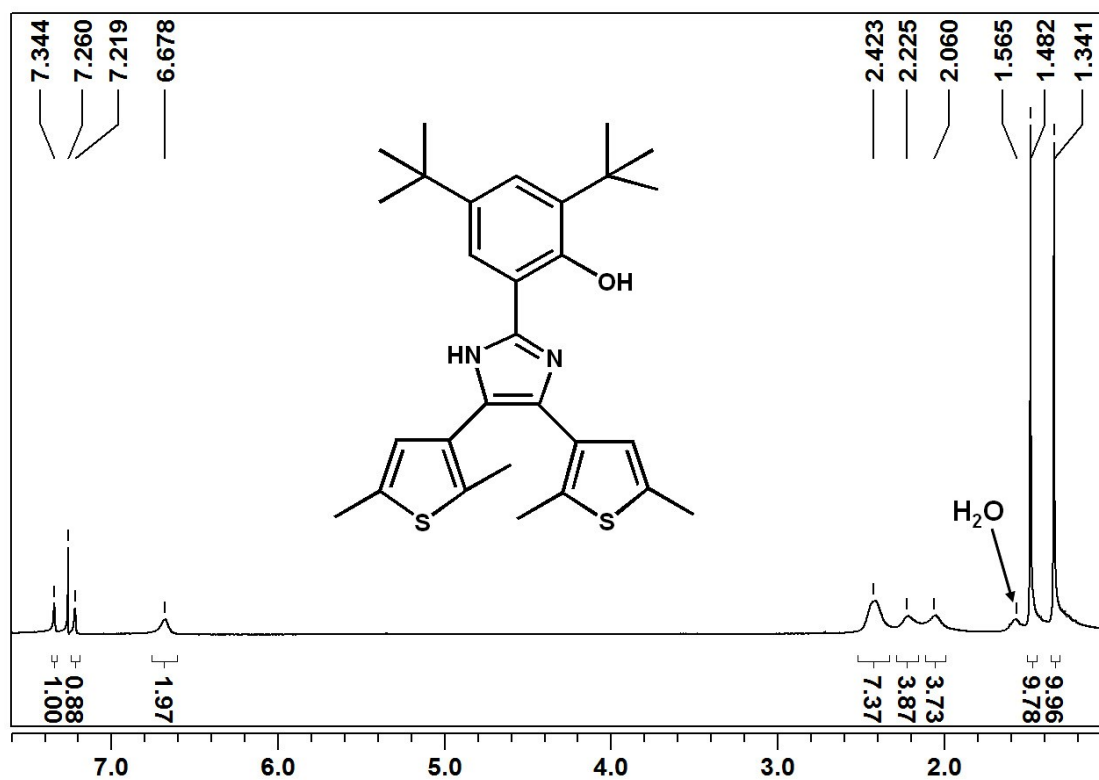

**Fig. S1** <sup>1</sup>H NMR spectrum of tBuLH (500 MHz, CDCl<sub>3</sub>).

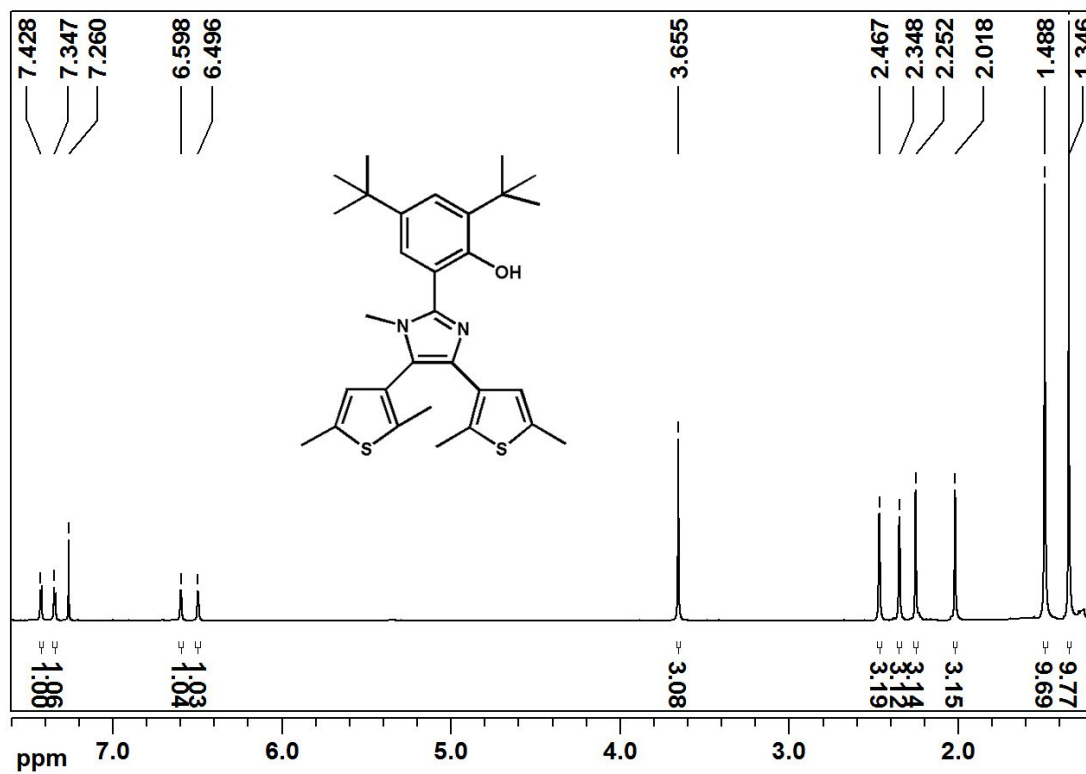

Fig. S2 <sup>1</sup>H NMR spectrum of tBuLMeH (300 MHz, CDCl<sub>3</sub>).

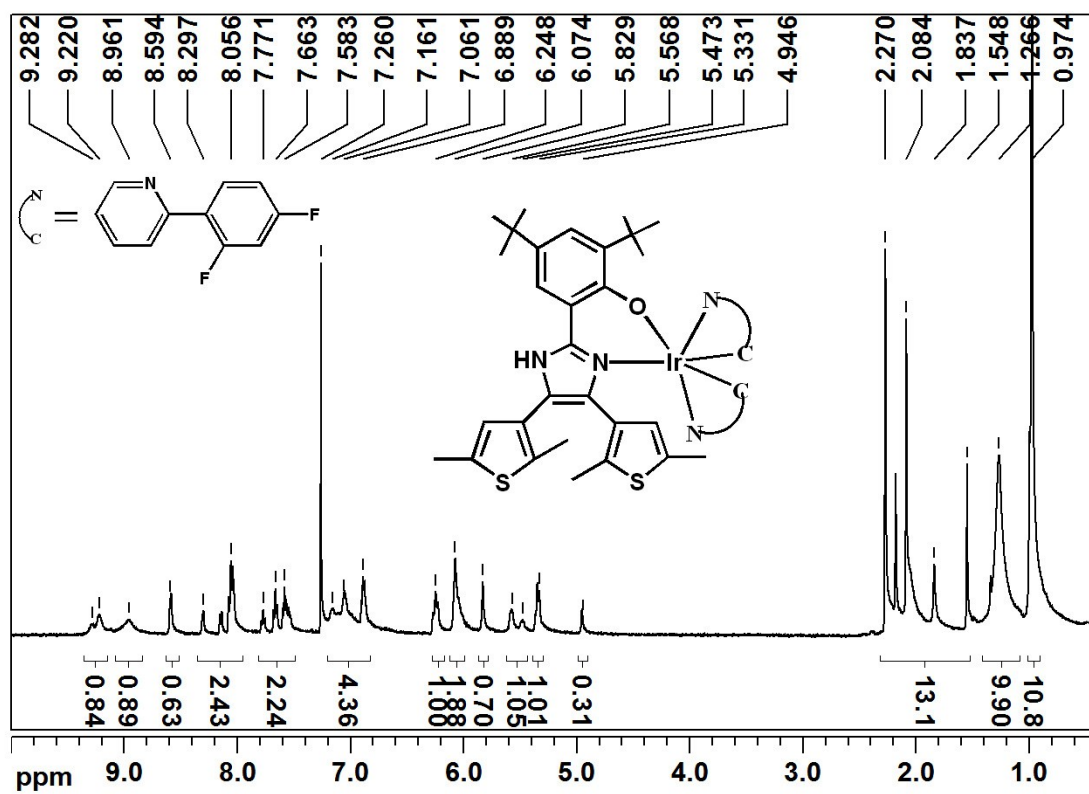

Fig. S3 <sup>1</sup>H NMR spectrum of 1 (500 MHz, CDCl<sub>3</sub>).

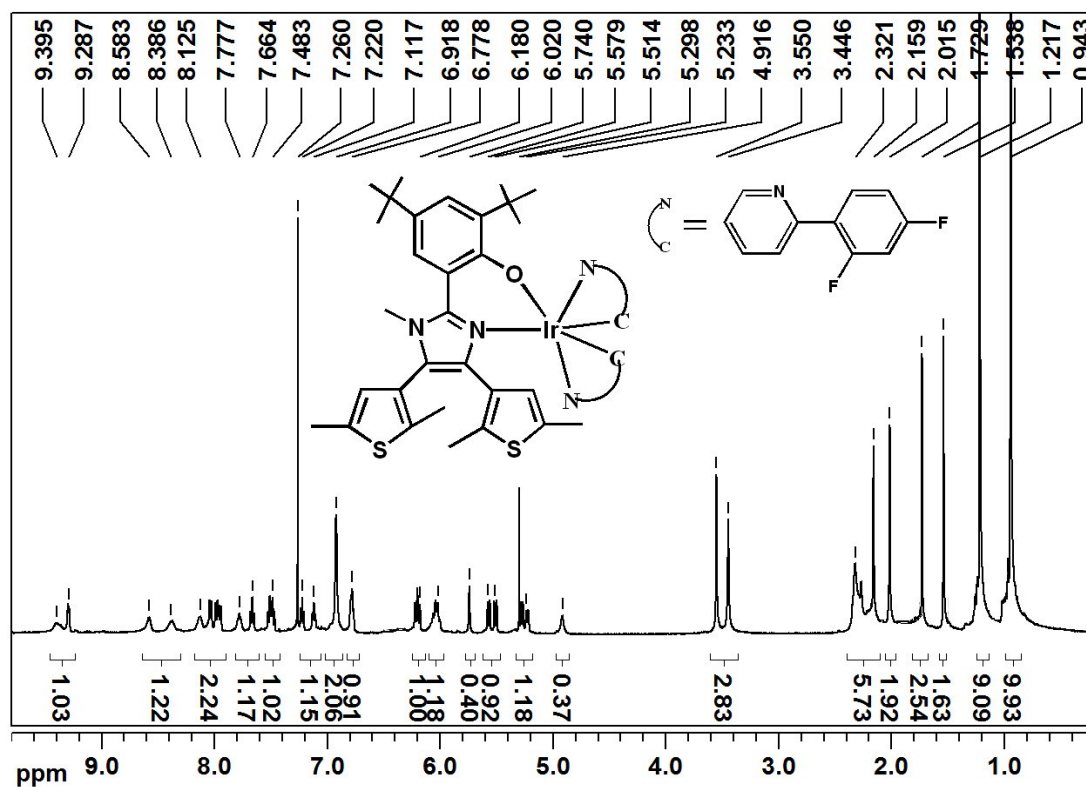

Fig. S4  $^1\text{H}$  NMR spectrum of **2** (500 MHz,  $\text{CDCl}_3$ ).

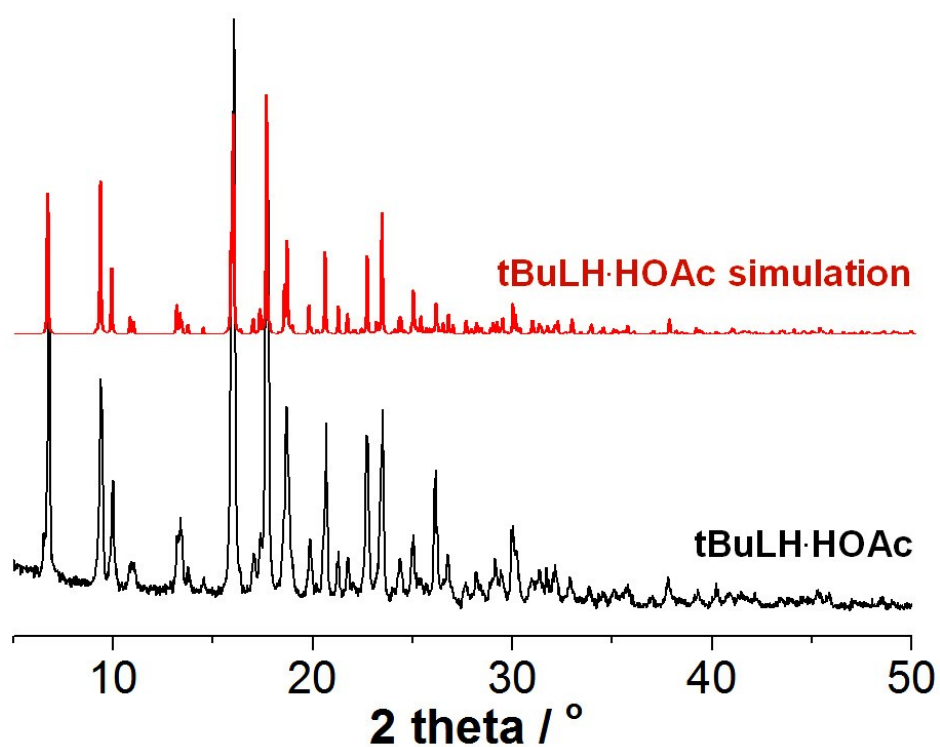

Fig. S5 Experimental and simulated XRD patterns of  $\text{tBuLH}\cdot\text{HOAc}$ .

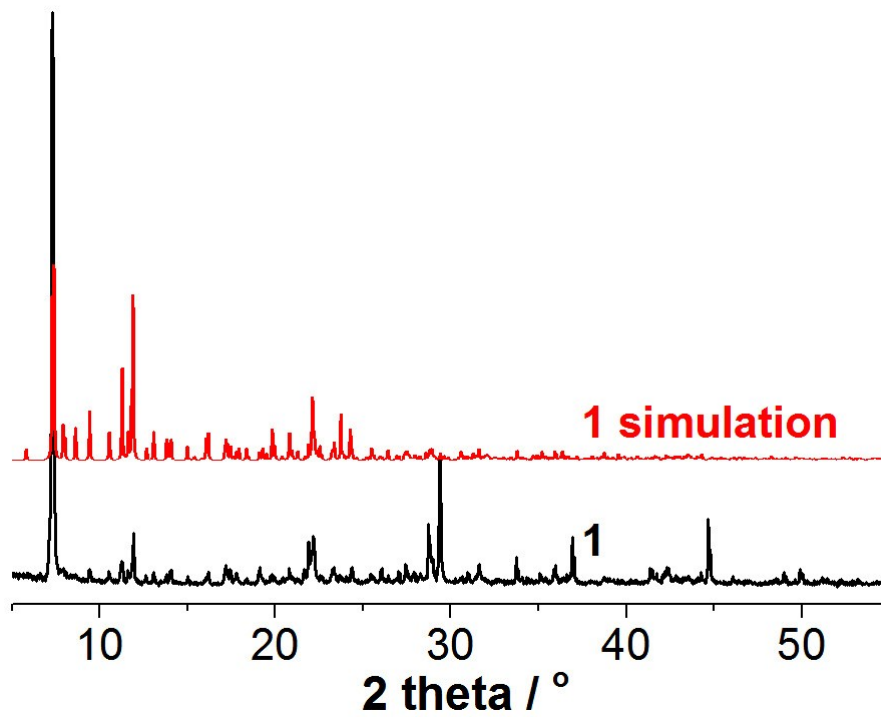

**Fig. S6** Experimental and simulated XRD patterns of 1.

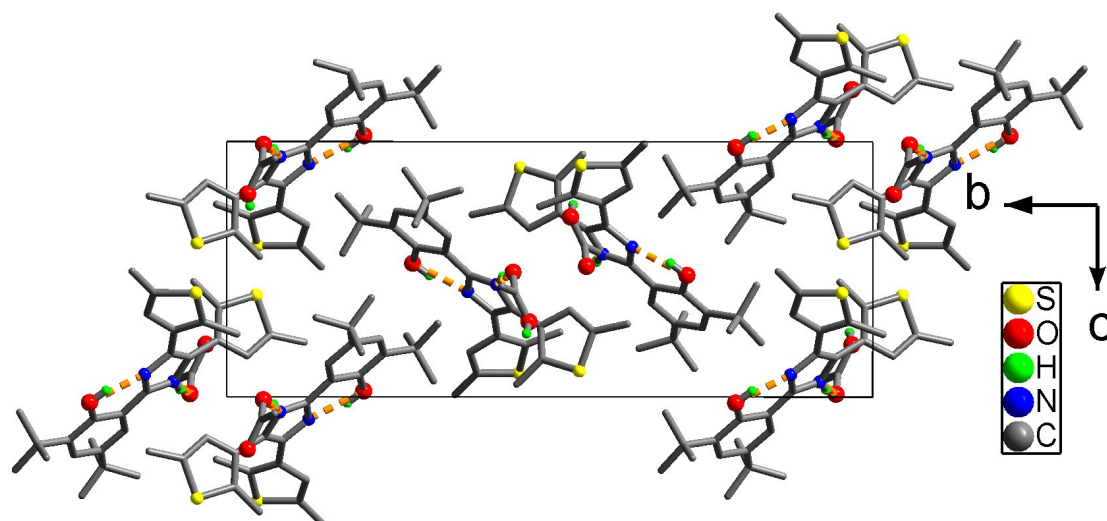

**Fig. S7** Packing structure of tBuLH·HOAc.

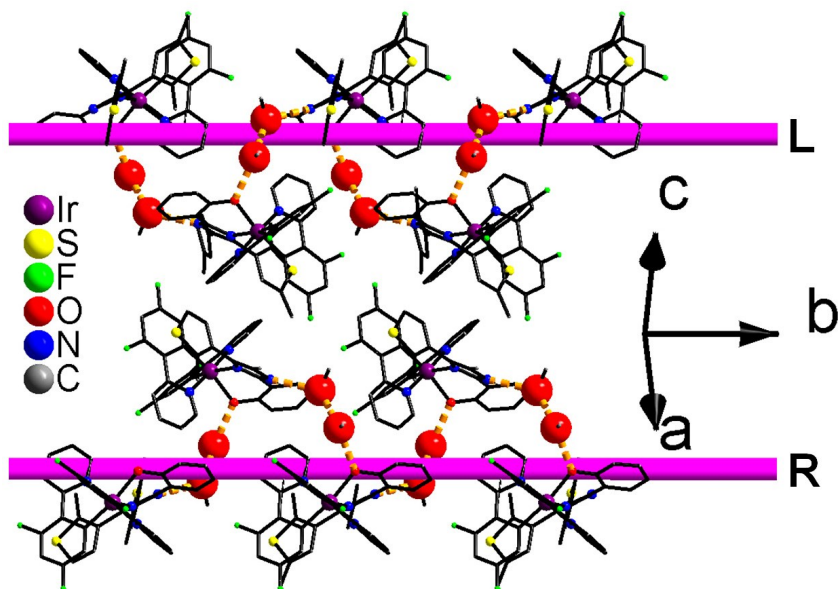

**Fig. S8** Packing structure of  $[\text{Ir}(\text{dfppy})_2(\text{L1})]\cdot 2\text{CH}_3\text{OH}$  containing right- and left-handed helical chains (denoted as R and L, respectively). Red balls are O atoms from  $\text{CH}_3\text{OH}$  molecules or phenolate groups.

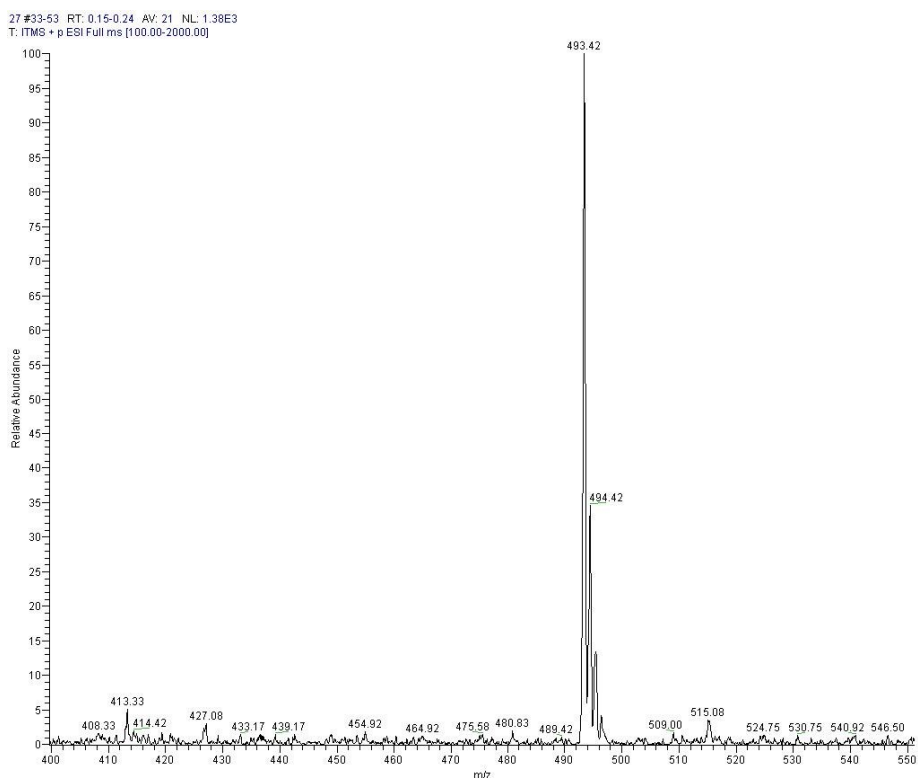

**Fig. S9** Electrospray mass spectrometry (ES-MS) of tBuLH in  $\text{CH}_3\text{OH}-\text{CH}_2\text{Cl}_2$  solution before UV irradiation ( $\lambda = 326 \text{ nm}$ ).

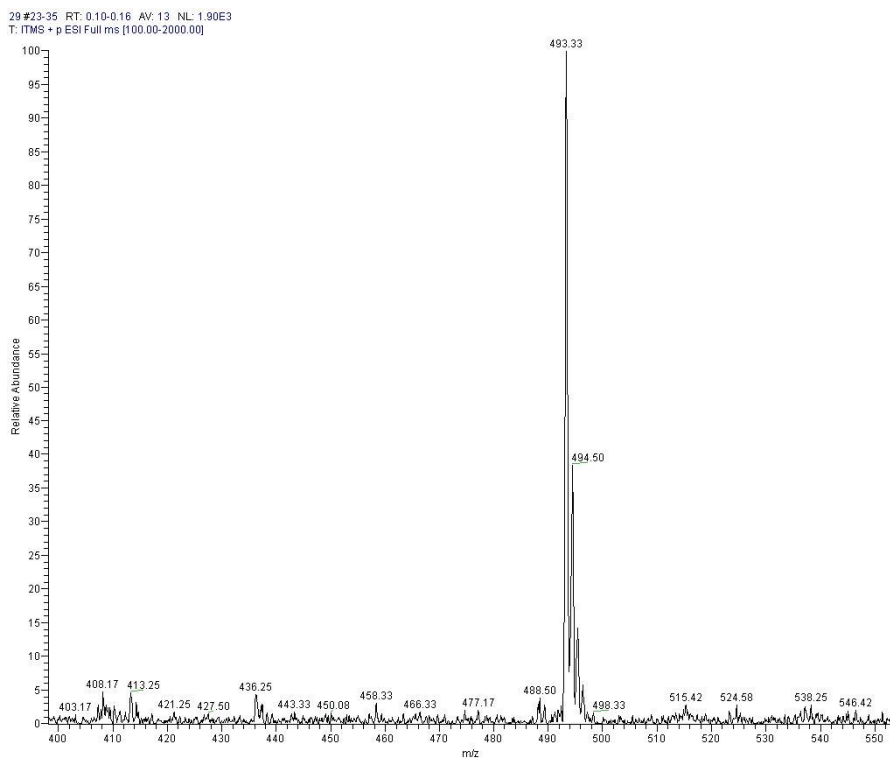

**Fig. S10** Electrospray mass spectrometry (ES-MS) of tBuLH in  $\text{CH}_3\text{OH-CH}_2\text{Cl}_2$  solution after 2.5-minute UV irradiation ( $\lambda = 326 \text{ nm}$ ).

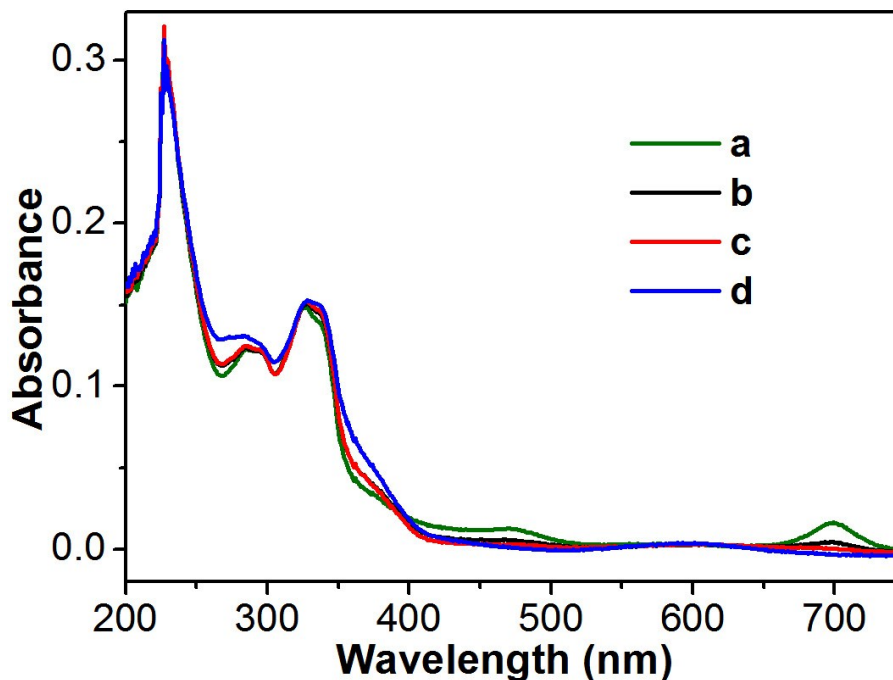

**Fig. S11** Plot a: irradiating ( $\lambda = 326 \text{ nm}$ ) the  $\text{CH}_2\text{Cl}_2$  solution of tBuLH ( $c = 1.0 \times 10^{-5} \text{ M}$ ) for 2.5 minutes; plots b and c: irradiating ( $\lambda = 700 \text{ nm}$ ) the solution corresponding to plot a for 1 and 2 minutes, respectively; plot d: placing the solution corresponding to plot a in the dark for 45 minutes.



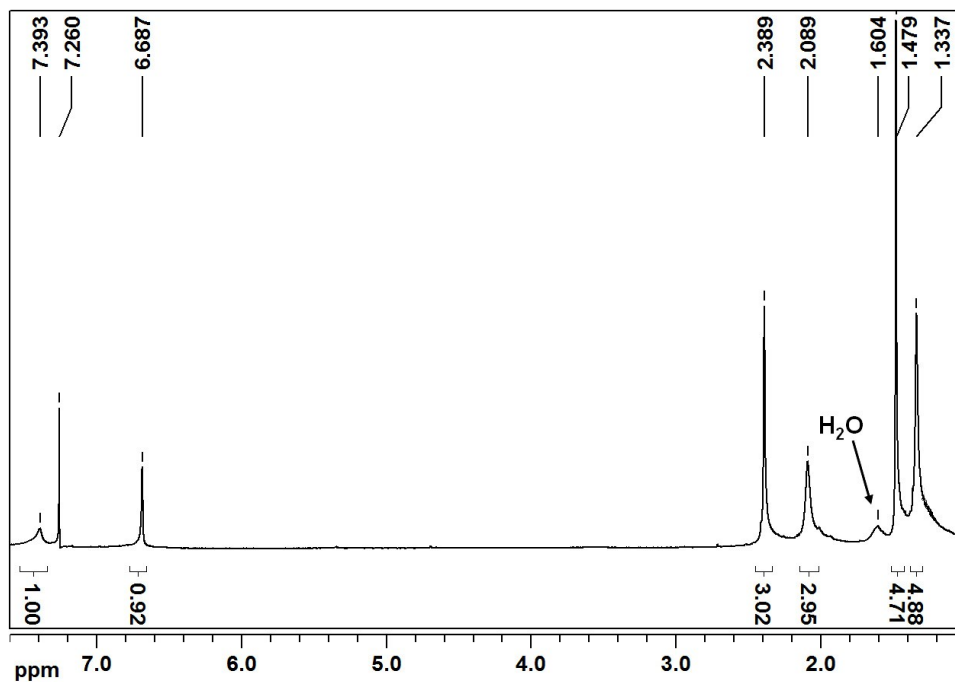

**Fig. S12** <sup>1</sup>H NMR spectrum of tBuLH after irradiation with 326 nm light (500 MHz, CDCl<sub>3</sub>).

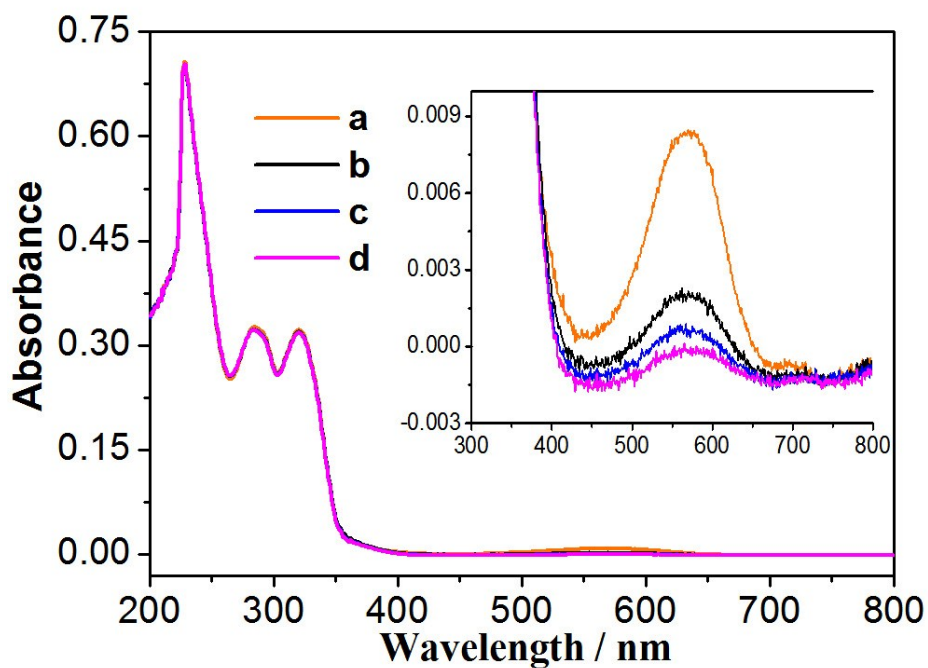

**Fig. S13** Plot a: irradiating ( $\lambda = 321$  nm) the CH<sub>2</sub>Cl<sub>2</sub> solution of tBuLMeH ( $c = 1.0 \times 10^{-5}$  M) for 2 minutes; plots b and c: irradiating ( $\lambda = 570$  nm) the solution corresponding to plot a for 0.5 and 1 minute, respectively; plot d: placing the solution corresponding to plot a in the dark for one hour.

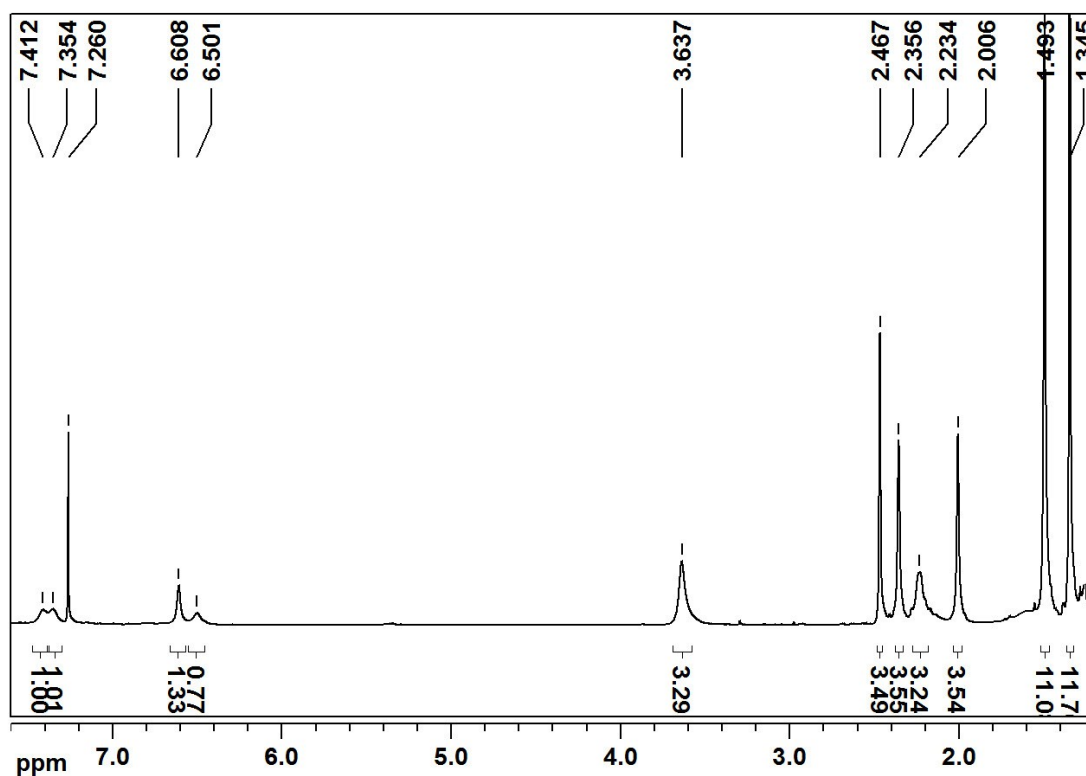

Fig. S14  $^1\text{H}$  NMR spectrum of tBuLMeH after irradiation with 321 nm light (300 MHz,  $\text{CDCl}_3$ ).

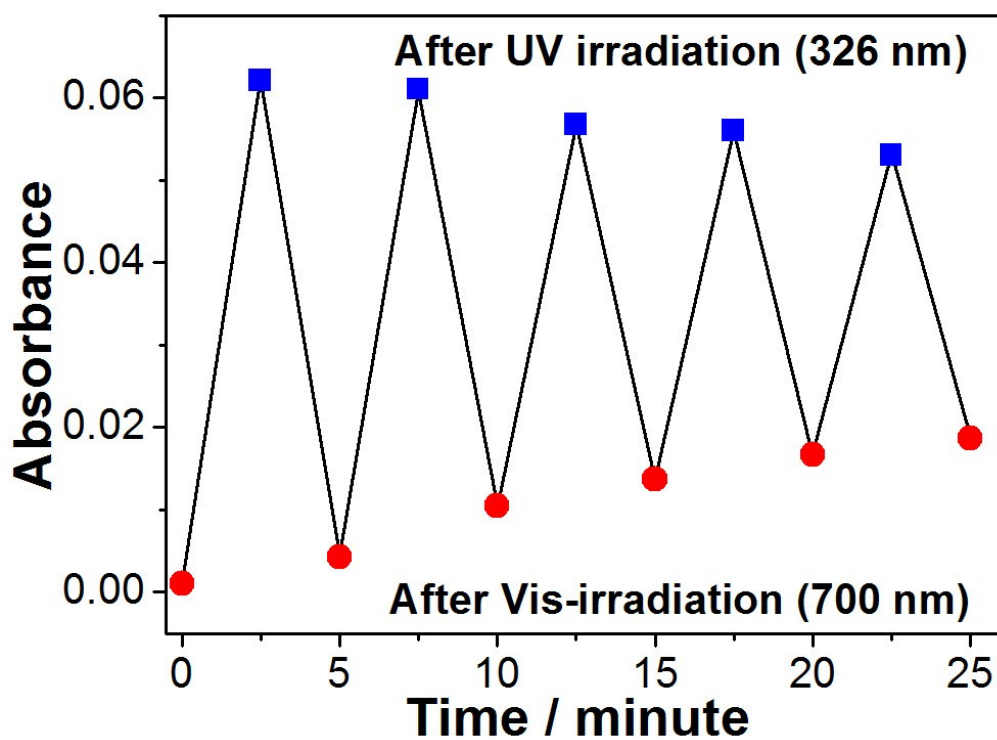

Fig. S15 UV-vis absorbance change of tBuLH at 700 nm in  $\text{CH}_2\text{Cl}_2$  at room temperature, upon alternative irradiation with 326 and 700 nm light (total 5 cycles).

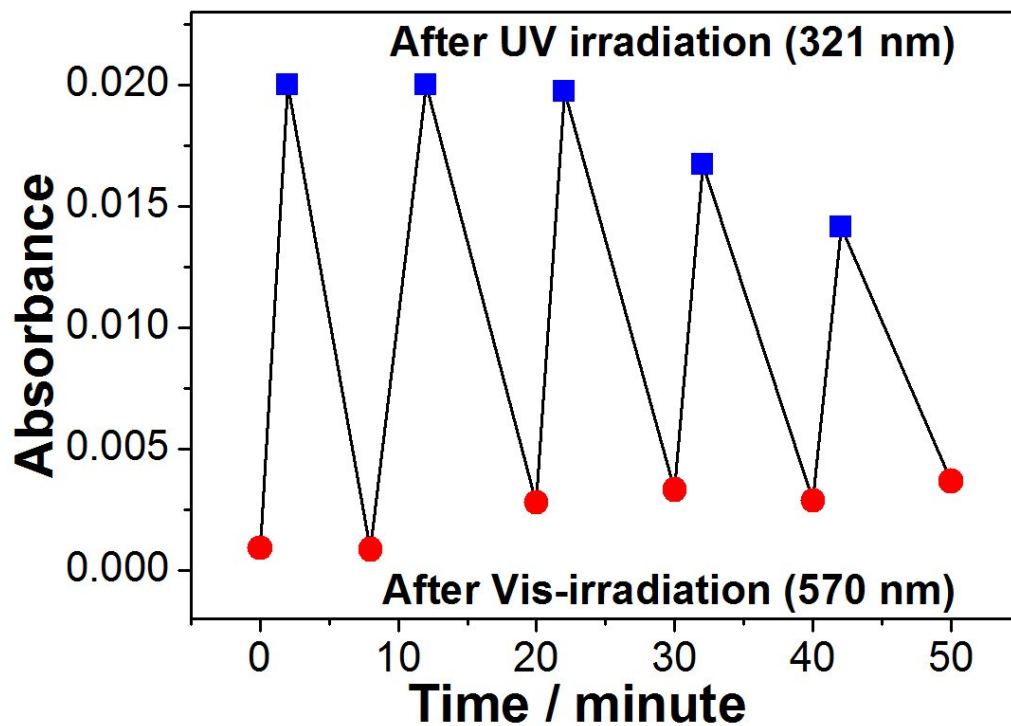

**Fig. S16** UV-vis absorbance change of tBuLMeH at 570 nm in CH<sub>2</sub>Cl<sub>2</sub> at room temperature, upon alternative irradiation with 321 and 570 nm light (total 5 cycles).

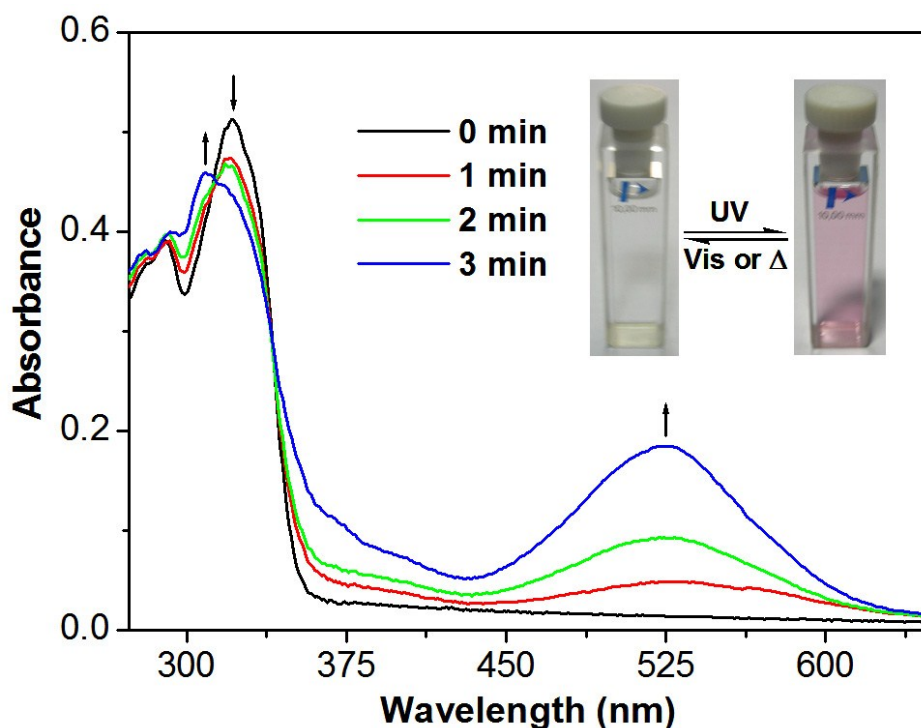

**Fig. S17** Absorption-spectra changes of hpbdtiH in CH<sub>2</sub>Cl<sub>2</sub>-CH<sub>3</sub>CN (v/v = 1/4) solution ( $c = 2.5 \times 10^{-5}$  M) upon UV irradiation ( $\lambda = 321$  nm) for 0 - 3 minutes, from the ESI of *Chem. Commun.*, 2013, **49**, 8863.

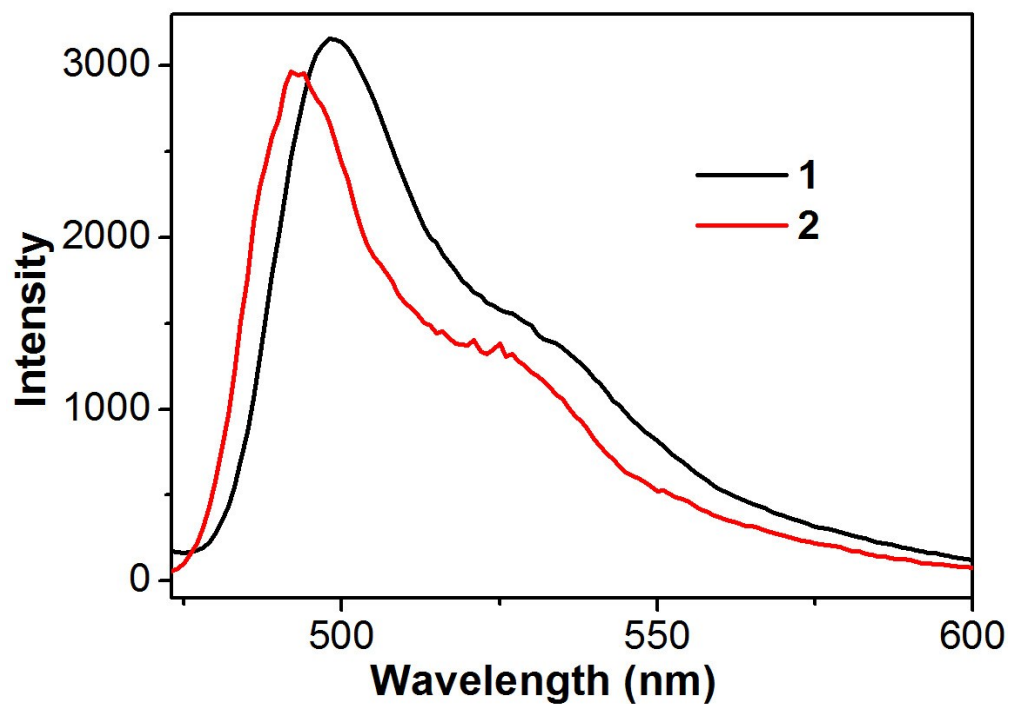

**Fig. S18** Phosphorescence spectra of **1** and **2** in C<sub>2</sub>H<sub>5</sub>OH-CH<sub>3</sub>OH (v/v = 3/1) at 77 K ( $c = 1.5 \times 10^{-4}$  M,  $\lambda_{\text{ex}} = 370$  nm).

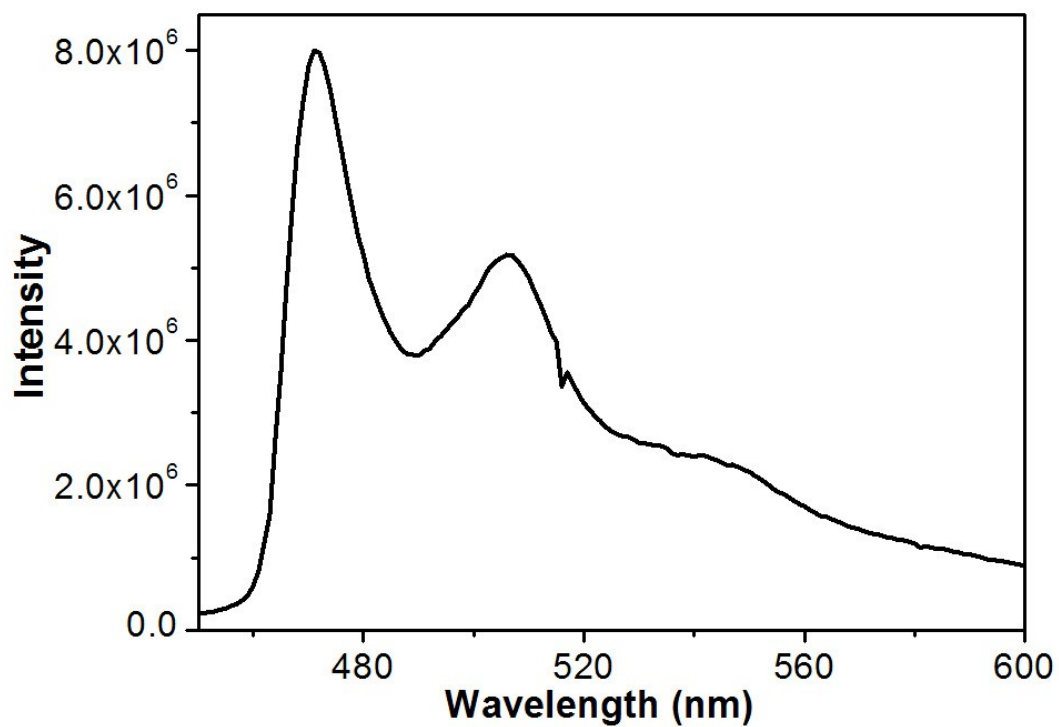

**Fig. S19** Phosphorescence spectra of [Ir(dfppy)<sub>2</sub>(L1)]·2CH<sub>3</sub>OH in C<sub>2</sub>H<sub>5</sub>OH-CH<sub>3</sub>OH (v/v = 3/1) at 77 K ( $\lambda_{\text{ex}} = 405$  nm), from the ESI of *Dalton Trans.*, 2015, **44**, 4289.

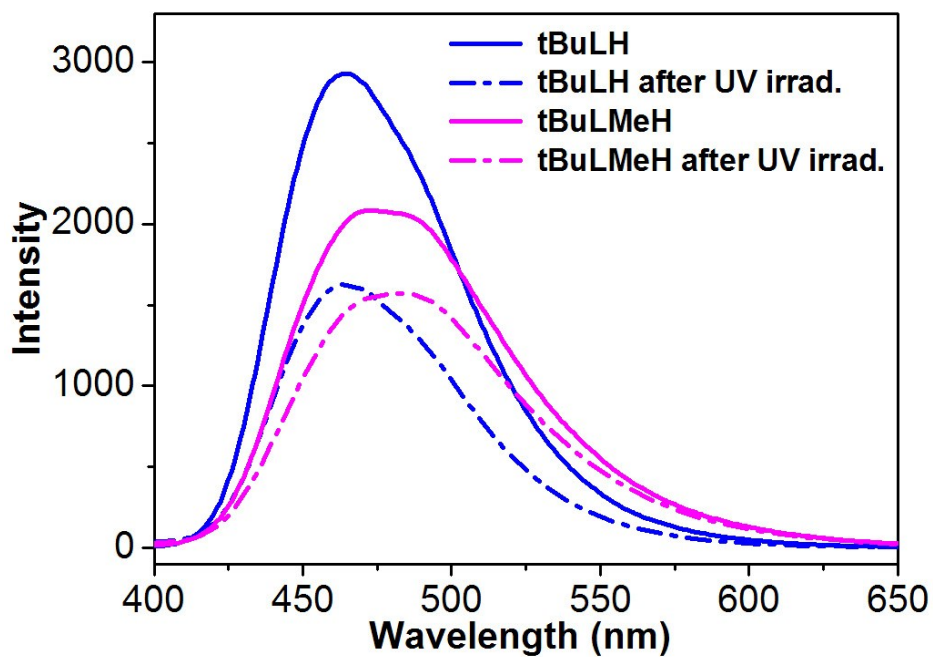

**Fig. S20** Luminescence spectra of tBuLH and tBuLMeH in CH<sub>2</sub>Cl<sub>2</sub> at room temperature before and after three-minute UV irradiation with 326 nm light for the former, and 321 nm light for the latter ( $c = 4 \times 10^{-5}$  M,  $\lambda_{\text{ex}} = 340$  nm for **2**).
